# Supplementary material for: Platelets are recruited to hepatocellular carcinoma tissues in a CX3CL1‐CX3CR1 dependent manner and induce tumour cell apoptosis
Source: PubMed Central journal article supplement (PMC7530782; doi:10.1002/1878-0261.12783), 2020-09-02
Supplement: MOL2-14-2546-s004.pdf [file MOL2-14-2546-s004.pdf]

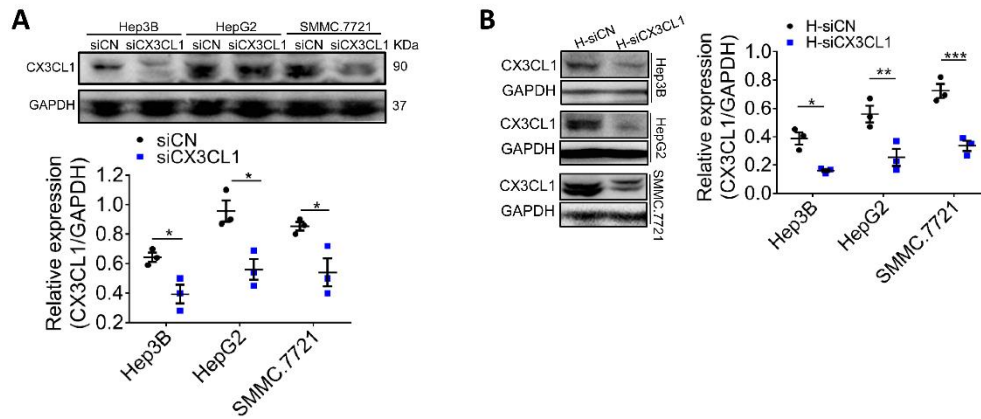

**Supplementary Fig.4. Analysis of CX3CL1 knockdown efficiency.** (A) Expression of CX3CL1 in HCC cells transfected with siCX3CL1 or siCN under normoxia (n=3, unpaired t test, 2-tailed, mean  $\pm$  SEM, \* $P$ <0.05). (B) HCC cells transfected with siCX3CL1 or siCN were cultured for 12 hours under hypoxia to detect CX3CL1 expression (n=3, unpaired t test, 2-tailed, mean  $\pm$  SEM, \* $P$ <0.05, \*\* $P$ <0.01, \*\*\* $P$ <0.001).
