# Supplementary material for: Platelets are recruited to hepatocellular carcinoma tissues in a CX3CL1‐CX3CR1 dependent manner and induce tumour cell apoptosis
Source: PubMed Central journal article supplement (PMC7530782; doi:10.1002/1878-0261.12783), 2020-09-02
Supplement: MOL2-14-2546-s007.pdf [file MOL2-14-2546-s007.pdf]

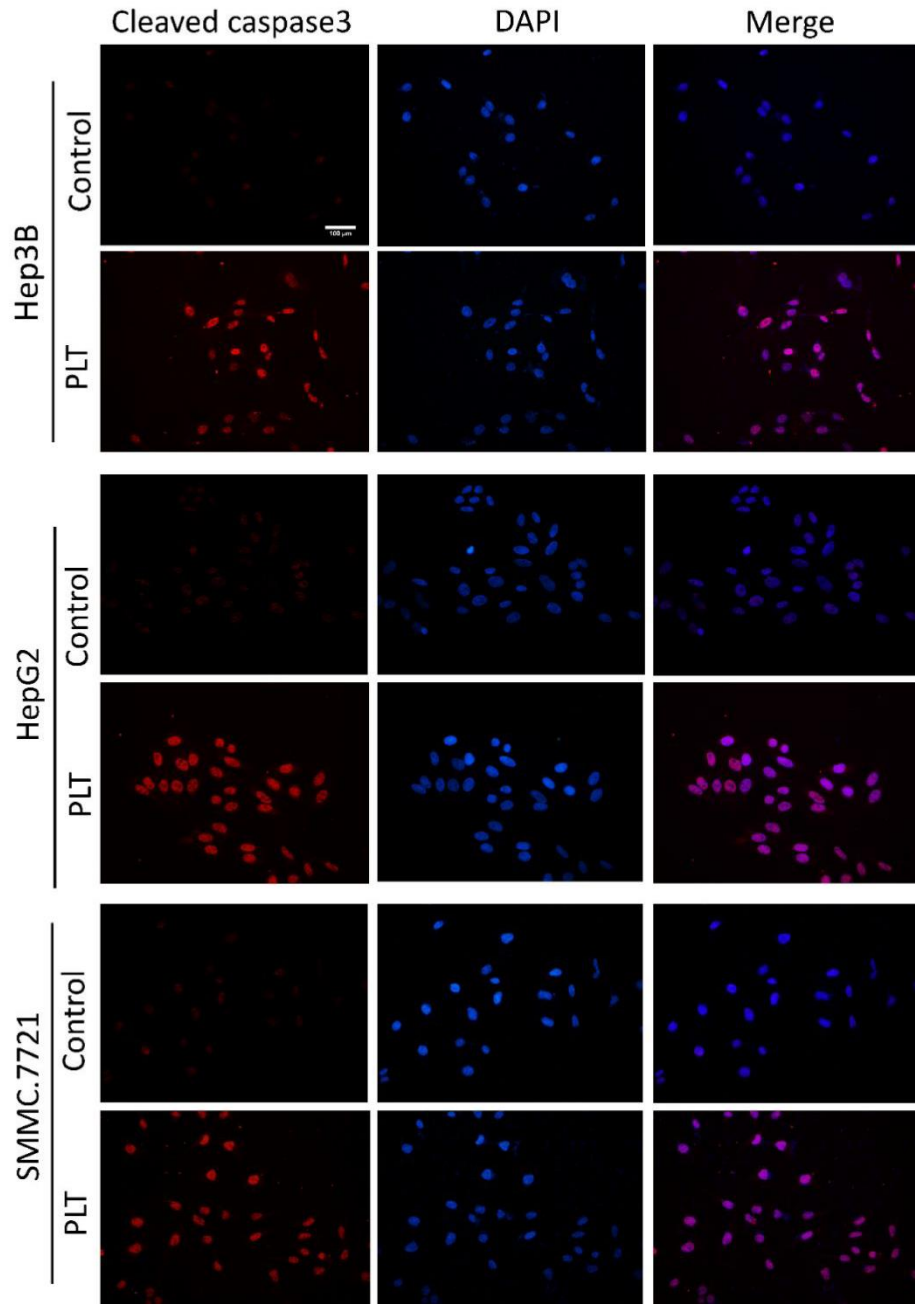

**Supplementary Fig. 7. Recruited platelets increase the level of cleaved caspase 3 in HCC cells.** In CM-induced platelet migration assay, platelets in the lower chamber were collected and then cultured with HCC cells for 24 hours. Analysis of cleaved caspase 3 expression by immunofluorescence (n=3). Cleaved caspase 3: red. Scar bar: 100 $\mu$ m.
